# Supplementary material for: Chromatographic and mass spectrometry analysis of wheat flour prolamins, the causative compounds of celiac disease
Source: Royal Society of Chemistry journal article supplement (doi:10.1039/c7fo00266a), 2017-01-01
Supplement: c7fo00266a1.pdf [file c7fo00266a1.pdf]

32 vortexing for 2 min at room temperature and continued with magnetic stirring during 1h.  
33 Ethanol-insoluble prolamins were extracted at 60°C under nitrogen. Extractions for each sample  
34 were done in duplicate and the supernatants were collected by centrifugation (10000×g for 15  
35 min). In the case of sodium chloride, an additional wash with deionised water was performed in  
36 order to remove the residual salt.

37 **Fractionation of gliadins fractions.** GLI fraction was submitted to a dialysis cleanup process  
38 before fractionation. Two different cut-off membranes (Spectrum Laboratories, Inc., Canada)  
39 were assayed, 3.5kDa and 12-14kDa. The dialyzed GLI at 12-14kDa were further separated into  
40 a preparative chromatographic system (Krauer K-1001 pump coupled to an Elite Lachrom L-  
41 2420 UV vis detector, Agilent Technologies). Sample was pumped at 4mL/min into a Purospher  
42 C18 (250x25mm, 5µm). The mobile phases used were (A) water (0.1%TFA) and (B)  
43 acetonitrile (0.1%TFA) from 24%B to 56%B in 140min. The chromatograms were obtained at  
44 214nm through the EZChrom Elite software (Agilent Technologies). The protein elution was  
45 monitorized and collected by measuring absorbance at 214nm. After isolated proteins from GLI  
46 (12-14kDa) were collected, these fractions were lyophilized and further characterized by mass  
47 spectrometry.

48

## 49 **RESULTS**

50 **Identification of gliadin sub-fractions by nano-LC-MS/MS.** Protein fractions resulting  
51 from GLI fractionation were submitted to enzymatic digestion. The hydrolysates were  
52 further analyzed by tandem mass spectrometry. Each fingerprint peptide was, therefore,  
53 used to sequence the peptides and further identify their precursor protein. The results are  
54 described in the following table.

55

56 **Table S1.** Identification of the richest gliadin sub-fractions from FIII by nano-LC-  
57 MS/MS and further data treatment in Proteome Discoverer

58

59

60

61

62

63



|        |         |      |      |        |          |      |      |        |        |      |      |      |       |        |      |        |        |        |      |      |          |      |      |      |
|--------|---------|------|------|--------|----------|------|------|--------|--------|------|------|------|-------|--------|------|--------|--------|--------|------|------|----------|------|------|------|
| 6      | A4URY8  | 70,0 | 59.4 | 1.0    | R4JB56   | 36,4 | 82.8 | 100    | J7I026 | 33,9 | 93.2 | 67   |       | Q9FS73 | 32,  | 98.7   | 43     | D2KFH2 | 11,3 | 76.5 | 14       |      |      |      |
|        | A0A059U | 88   | 0    | 5      |          | 58   | 9    |        |        | 58   | 3    |      |       | Q41547 | 576  | 6      |        |        | 25   | 5    |          |      |      |      |
|        | HD1     | 89,8 | 58.8 | 1.0    | R4JAP5   | 39,9 | 93.9 | 45     |        |      |      |      |       |        | 36,  | 93.2   | 42     |        |      |      |          |      |      |      |
|        |         | 35   | 2    | 2      | Q9XGF0   | 50   | 0    |        |        |      |      |      |       |        | 759  | 4      |        |        |      |      |          |      |      |      |
|        |         |      |      |        |          | 42,2 | 97.3 | 102    |        |      |      |      |       |        |      |        |        |        |      |      |          |      |      |      |
| 7      | A4URY8  | 70,0 | 69.1 | 1.1    | R4JAP5   | 39,9 | 98.2 | 34     | A5JSA8 | 33,2 | 98.0 | 75   | I0IT5 | 33,3   | 100. | 56     | Q9S8M8 | 2,2    | 95.6 | 56   | D2KFH2   | 11,3 | 67.8 | 97   |
|        |         | 38   | 1    | 6      |          | 50   | 0    |        |        | 13   | 0    |      | 7     | 92     | 00   |        | 40     | 4      |      |      | 25       | 9    |      |      |
|        | Q03872  | 89,8 | 58.1 | 1.3    | R4JDM1   | 36,3 | 100. | 116    | J7I026 | 33,9 | 90.3 | 15   |       |        |      |        | B8XU40 | 34,    | 99.1 | 96   | G9I0S9   | 32,3 | 56,4 | 54   |
|        |         | 19   | 9    | 2      |          | 56   | 00   |        |        | 58   | 0    |      |       |        |      |        | 900    | 0      |      |      |          | 52   | 3    |      |
|        | Q1KL95  | 84,6 | 58.0 | 1.1    | Q9XGF0   | 42,2 | 92.4 | 89     | F6M8E7 | 17,1 | 93.6 | 91   |       |        |      |        |        |        |      |      |          |      |      |      |
|        |         | 77   | 1    | 3      |          | 42   | 7    |        |        | 51   | 1    |      |       |        |      |        |        |        |      |      |          |      |      |      |
|        |         |      |      |        | A0A068F6 | 33,3 | 82.8 | 115    | K7XE68 | 33,5 | 80.2 | 92   |       |        |      |        |        |        |      |      |          |      |      |      |
|        |         |      |      |        | W7       | 02   | 9    |        |        | 52   | 3    |      |       |        |      |        |        |        |      |      |          |      |      |      |
|        |         |      |      |        | V9P737   | 34,2 | 93.9 | 100    | K7X1L1 | 32,1 | 100. | 71   |       |        |      |        |        |        |      |      |          |      |      |      |
|        |         |      |      |        |          | 16   | 0    |        |        | 13   | 00   |      |       |        |      |        |        |        |      |      |          |      |      |      |
|        |         |      |      |        |          |      |      |        | Q3YFI1 | 32,8 | 57.1 | 84   |       |        |      |        |        |        |      |      |          |      |      |      |
|        |         |      |      |        |          |      |      |        |        | 93   | 4    |      |       |        |      |        |        |        |      |      |          |      |      |      |
|        |         |      |      |        |          |      |      |        | Q9M4L8 | 32,3 | 98.5 | 61   |       |        |      |        |        |        |      |      |          |      |      |      |
|        |         |      |      |        |          |      |      |        |        | 70   | 8    |      |       |        |      |        |        |        |      |      |          |      |      |      |
| 8      | A4URY8  | 70,0 | 56.0 | 57     | Q9XGF0   | 42,2 | 92.6 | 101    | F6M8E7 | 17,1 | 100. | 60   | I0IT5 | 34,1   | 100. | 93     | R9XUT4 | 37,    | 95.4 | 88   | D2KFH2   | 11,3 | 99.7 | 79   |
|        |         | 38   | 0    |        |          | 42   | 1    |        |        | 51   | 00   |      | 9     | 14     | 00   |        | 225    | 3      |      |      | 25       | 6    |      |      |
|        | Q03872  | 89,8 | 54.6 | 28     | A0A089VM | 37,5 | 95.8 | 121    | X2KWL1 | 35,7 | 98.6 | 82   |       |        |      |        | B6DQB2 | 31,    | 73.9 | 42   | G9I0S9   | 32,3 | 97.6 | 45   |
|        |         | 19   | 7    |        | B3       | 48   | 2    |        |        | 09   | 6    |      |       |        |      |        | 847    | 8      |      |      |          | 52   | 5    |      |
|        |         |      |      |        | D3UAL6   | 36,2 | 98.9 | 144    | K7WV42 | 32,8 | 100. | 19   |       |        |      |        |        |        |      |      |          |      | 22,3 | 100. |
|        |         |      |      |        | 83       | 5    |      |        | 31     | 00   |      |      |       |        |      |        |        |        |      |      |          | 71   | 00   |      |
|        |         |      |      |        | B2Y2Q6   | 42,1 | 95.5 | 108    | X2KS61 | 34,5 | 79.7 | 18   |       |        |      |        |        |        |      |      |          |      |      |      |
|        |         |      |      |        |          | 09   | 9    |        |        | 17   | 4    |      |       |        |      |        |        |        |      |      |          |      |      |      |
|        |         |      |      |        | Q0GNF9   | 32,4 | 91.1 | 1.3    |        |      |      |      |       |        |      |        |        |        |      |      |          |      |      |      |
|        |         |      |      |        |          | 24   | 9    | 9      |        |      |      |      |       |        |      |        |        |        |      |      |          |      |      |      |
| 9      |         |      |      |        | Q5MFH4   | 34,4 | 98.3 | 55     | K7WV42 | 32,8 | 100. | 89   | M7ZZ  | 23,5   | 100. | 56     | A7XDG3 | 16,    | 100. | 50   | D2KFH2   | 11,3 | 94.1 | 23   |
|        |         |      |      |        |          | 85   | 4    |        |        | 31   | 00   |      | V2    | 58     | 00   |        | 206    | 00     |      |      | 25       | 2    |      |      |
|        | Q94IJ6  | 77,3 | 51.9 | 18     | R4JAP5   | 39,9 | 96.3 | 45     | Q3YFI1 | 32,8 | 82.8 | 11   | Q3S4  | 32,5   | 98.6 | 21     | B6DQB8 | 32,    | 98.7 | 96   | V5M290   | 32,3 | 100. | 45   |
|        |         | 71   | 7    |        |          | 50   | 8    |        |        | 93   | 9    |      | V7    | 68     | 5    |        | 449    | 6      |      |      |          | 09   | 00   |      |
|        | B5TM09  | 79,2 | 56.6 | 12     | Q00M55   | 40,0 | 97.3 | 54     | R9XV20 | 34,4 | 93.9 | 75   | I0IT5 | 33,3   | 75.9 | 23     | U5UA50 | 32,    | 99.4 | 83   |          |      |      |      |
|        | 78      | 0    |      |        | 31       | 9    |      |        | 04     | 0    |      | 7    | 92    | 6      |      | 691    | 3      |        |      |      |          |      |      |      |
| A0MZ38 | 88,4    | 55.3 | 15   | F8SGN3 | 40,0     | 93.2 | 102  | R9XW75 | 34,4   | 97.3 | 17   | P047 | 33,6  | 99.1   | 65   | F2X0K8 | 33,    | 100.   | 31   |      |          |      |      |      |
|        | 61      | 9    |      |        | 71       | 3    |      |        | 18     | 3    |      | 22   | 61    | 2      |      | 083    | 00     |        |      |      |          |      |      |      |
|        |         |      |      |        | B2Y2Q7   | 41,9 | 100. | 118    | X2KS61 | 34,5 | 98.2 | 20   |       |        |      |        |        |        |      |      |          |      |      |      |
|        |         |      |      |        |          | 81   | 00   |        |        | 17   | 0    |      |       |        |      |        |        |        |      |      |          |      |      |      |
|        |         |      |      |        | Q9XGF0   | 42,2 | 97.8 | 177    |        |      |      |      |       |        |      |        |        |        |      |      |          |      |      |      |
|        |         |      |      |        |          | 42   | 6    |        |        |      |      |      |       |        |      |        |        |        |      |      |          |      |      |      |
| 10     | A5HMG2  | 79,4 | 65.7 | 1 8    | R4JAN5   | 37,7 | 98.0 | 104    | F6M8E7 | 17,1 | 92.4 | 91   | Q3S4  | 33,4   | 100. | 47     | B6DQB4 | 32,    | 96.7 | 97   |          |      |      |      |
|        |         | 67   | 9    |        |          | 63   | 0    |        |        | 51   | 7    |      | V8    | 85     | 00   |        | 295    | 8      |      |      |          |      |      |      |
|        | G3K725  | 93,6 | 78.9 | 110    |          |      |      |        |        | 32,1 | 100. | 8 1  |       |        |      |        | B6UKS0 | 34,    | 78.9 | 43   |          |      |      |      |
|        | 48      | 8    |      |        |          |      |      |        |        | 13   | 00   |      |       |        |      | 439    | 8      |        |      |      |          |      |      |      |
|        |         |      |      |        |          |      |      |        | K7WV42 | 32,8 | 92.6 | 16   |       |        |      |        | R9XWD0 | 37,    | 98.3 | 68   |          |      |      |      |
|        |         |      |      |        |          |      |      |        |        | 31   | 1    |      |       |        |      |        | 229    | 4      |      |      |          |      |      |      |
|        |         |      |      |        |          |      |      |        | X2KS61 | 34,5 | 95.8 | 70   |       |        |      |        |        |        |      |      |          |      |      |      |
|        |         |      |      |        |          |      |      |        |        | 17   | 2    |      |       |        |      |        |        |        |      |      |          |      |      |      |
| 11     |         |      |      |        | I3QPI2   | 17,3 | 89.7 | 142    | Q41528 | 33,1 | 98.9 | 32   | I0IT5 | 33,3   | 91.6 | 95     | P08453 | 37,    | 97.3 | 17   | D2KFH2   | 11,3 | 65.7 | 90   |
|        |         |      |      |        |          | 99   | 6    |        |        | 93   | 5    |      | 7     | 92     | 5    |        | 122    | 9      |      |      | 25       | 6    |      |      |
|        |         |      |      |        | B2Y2S2   | 38,9 | 97.6 | 40     | Q9M4M3 | 30,6 | 100. | 76   | I0IT5 | 30,9   | 97.6 | 56     | L7R429 | 31,    | 76.5 | 89   | A0A0B5JD | 39,2 | 100. | 9    |
|        |         |      |      |        | 77       | 5    |      |        | 25     | 00   |      | 8    | 59    | 5      |      | 294    | 4      |        |      | 20   | 42       | 00   | 5    |      |
|        |         |      |      |        | Q8W3X0   | 38,8 | 99.0 | 43     | X2KWE1 | 35,5 | 100. | 89   |       |        |      |        | Q6EEX0 | 31,    | 69.8 | 98   |          |      |      |      |
|        |         |      |      |        |          | 18   | 0    |        |        | 67   | 00   |      |       |        |      |        | 451    | 7      |      |      |          |      |      |      |
